# Supplementary material for: Characterization of the ATP-Dependent Lon-Like Protease inMethanobrevibacter smithii
Source: Hindawi journal article supplement (doi:10.1155/2016/5759765), 2016-01-01
Supplement: f1 [file 5759765.f1.pdf]

Supplementary Table 1. Percent sequence identity matrix of Lon-like and Lon proteases from *Methanobrevibacter smithii* (msm\_1754 (WP\_011954752) and msm\_1569 (WP\_011954598.1)), *Paenibacillus sanguinis* (WP\_018751256.1), *Desulfosporosinus* sp. Tol-M (KGP77159.1), *Thermoanaerobacterium thermosaccharolyticum* (WP\_013297045.1), *Bacillus cereus* (WP\_001993072.1), *Clostridium ljungdahlii* (WP\_013239896.1), *Escherichia coli* (WP\_001295325.1), *Homo sapiens* (NP\_004784.2), *Saccharomyces cerevisiae* (NP\_009531.1), *Haloferax volcanii* (WP\_004044154.1), *Thermococcus kodakarensis* (WP\_011250215.1), *Thermoplasma acidophilum* (WP\_010901491.1), and *Methanocaldococcus jannaschii* (AAB99427.1).

|                                     | 1      | 2      | 3      | 4      | 5      | 6      | 7      | 8      | 9      | 10     | 11     | 12     | 13     | 14     |
|-------------------------------------|--------|--------|--------|--------|--------|--------|--------|--------|--------|--------|--------|--------|--------|--------|
| Lon-like-Ms (msm_1754) (1)          | 100.00 | 64.96  | 64.22  | 63.26  | 62.67  | 62.67  | 19.31  | 18.64  | 17.38  | 17.00  | 13.05  | 15.67  | 14.92  | 17.47  |
| <i>P. sanguinis</i> (2)             | 64.96  | 100.00 | 86.59  | 74.70  | 72.19  | 70.71  | 19.00  | 18.68  | 18.84  | 15.86  | 13.94  | 15.16  | 15.38  | 18.73  |
| <i>D. sp.</i> Tol-M (3)             | 64.22  | 86.59  | 100.00 | 73.52  | 70.12  | 70.56  | 17.71  | 18.47  | 17.93  | 15.03  | 14.12  | 13.95  | 14.97  | 17.30  |
| <i>T. thermosaccharolyticum</i> (4) | 63.26  | 74.70  | 73.52  | 100.00 | 81.66  | 83.43  | 20.44  | 20.11  | 19.00  | 17.42  | 13.82  | 14.86  | 15.29  | 18.90  |
| <i>B. cereus</i> (5)                | 62.67  | 72.19  | 70.12  | 81.66  | 100.00 | 81.51  | 20.44  | 20.29  | 19.35  | 17.21  | 14.63  | 16.27  | 15.88  | 18.29  |
| <i>C. ljungdahlii</i> (6)           | 62.67  | 70.71  | 70.56  | 83.43  | 81.51  | 100.00 | 19.89  | 20.11  | 19.35  | 17.62  | 13.62  | 15.46  | 14.71  | 18.29  |
| <i>E. coli</i> (7)                  | 19.31  | 19.00  | 17.71  | 20.44  | 20.44  | 19.89  | 100.00 | 36.92  | 37.29  | 19.15  | 21.61  | 21.28  | 19.11  | 22.37  |
| <i>H. sapiens</i> (8)               | 18.64  | 18.68  | 18.47  | 20.11  | 20.29  | 20.11  | 36.92  | 100.00 | 44.50  | 18.28  | 21.18  | 19.86  | 19.56  | 20.61  |
| <i>S. cerevisiae</i> (9)            | 17.38  | 18.84  | 17.93  | 19.00  | 19.35  | 19.35  | 37.29  | 44.50  | 100.00 | 19.50  | 20.44  | 20.34  | 21.39  | 20.82  |
| Lon-Ms (msm_1569) (10)              | 17.00  | 15.86  | 15.03  | 17.42  | 17.21  | 17.62  | 19.15  | 18.28  | 19.50  | 100.00 | 50.46  | 53.07  | 35.94  | 57.84  |
| <i>H. volcanii</i> (11)             | 13.05  | 13.94  | 14.12  | 13.82  | 14.63  | 13.62  | 21.61  | 21.18  | 20.44  | 50.46  | 100.00 | 53.00  | 34.66  | 55.68  |
| <i>T. acidophilum</i> (12)          | 15.67  | 15.16  | 13.95  | 14.86  | 16.27  | 15.46  | 21.28  | 19.86  | 20.34  | 53.07  | 53.00  | 100.00 | 35.25  | 59.65  |
| <i>M. jannaschii</i> (13)           | 14.92  | 15.38  | 14.97  | 15.29  | 15.88  | 14.71  | 19.11  | 19.56  | 21.39  | 35.94  | 34.66  | 35.25  | 100.00 | 38.69  |
| <i>M. jannaschii</i> (14)           | 17.47  | 18.73  | 17.30  | 18.90  | 18.29  | 18.29  | 22.37  | 20.61  | 20.82  | 57.84  | 55.68  | 59.65  | 38.69  | 100.00 |

## Supplementary Fig. 1

A

Lon-like-Ms

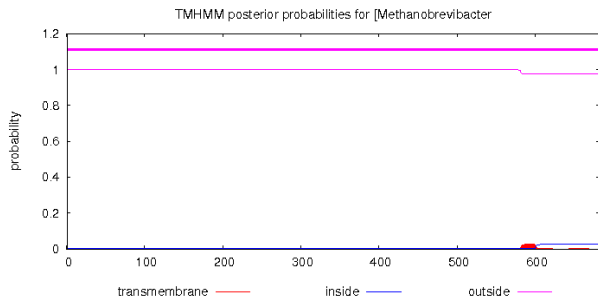

Lon-Tk

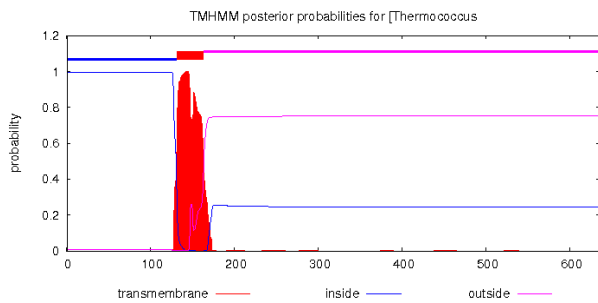

Lon-Ec

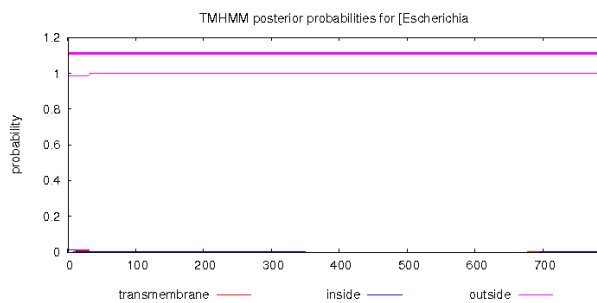

B

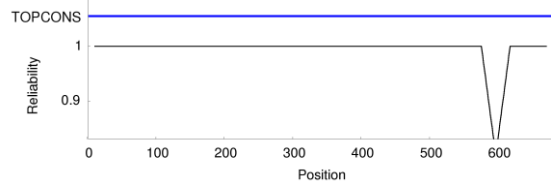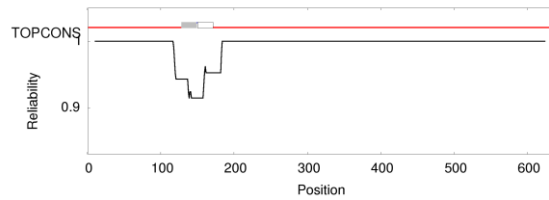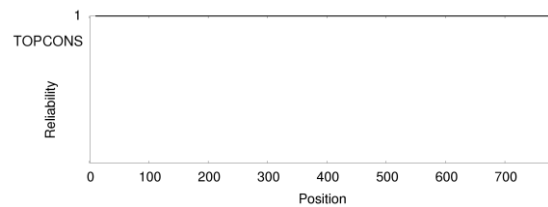

Supplementary Fig. 1. Transmembrane prediction of of Lon-like-Ms, Lon-Ec and Lon-Tk by TMHMM (A) and TOPCONS (B).
